# Supplementary material for: Bacillus subtilis-Fermented Amomum xanthioides Ameliorates Metabolic-Syndrome-Like Pathological Conditions in Long-Term HFHFD-Fed Mice
Source: MDPI journal article supplement (doi:10.3390/antiox11112254), 2022-11-15
Supplement: s1 [file s1]

**Table S1.** Microbial identification by 16s ribosomal RNA sequencing

Sample name: BS211229

Number of bases: 1492 bps    GC: 50.8%    AT: 49.2%

Primer: 27F and 1429R

GCTTGCTCCCTGATGTTAGCGGGACGGGTGAGTAACACGTGGGTAACCTGCCTGTAAGACTGGGATAACTCCGGGAACCGGGGCTAATACCGGATGGTGTGTTGAACCGCATGGTTCAGACATAAAAGGTGGCTTCGGCTACCACCTTACAGATGGACGCCGGCGCATTAGTAGTTGGTGAGGTAACGGGCTACCAAGGCGACGATGCGTAGCCGACCTGAGAGGGTGATCGGCCACACTGGGACTGAGACAGGCCAGACTCCTACGGGAGGCAGTAGGGAATCTTCGCAATGGACGAAAGTCTGACGGAGCAAACGCCGCGTGAGTGAAGGTTTTTCGATCGTAAAGCTCTGTTGTTAGGGAAGAACAAGTGCCGTTCAAATAGGCGCGCACCTTGACGGTACCTAACCCAGAAAGCCACGGCTAACTACGTGCCAGCAGCCGCGGTAATACGTAAGGTGGCAAGCGTTGTCCGGAATTATTGGGCGTAAAGGGCTCGCAGGCGGTTTCTTAAGTCTGATGTGAAAGCCCCCGGCTCAACCGGGGAGGGTCATTGAAAACCTGGGAACTTGAGTGCAGAAAGAGGAGAGTGGAATCCACGTGTAGCGGTGAAATGCGTAGAGATGTGGAGGAACACCAGTGGCGAAGGCGACTCTCTGGTCTGTAACCTGACGCTGAGGAGCGAAAGCGTGGGGAGCGAACAGGATTAGATACCTGGTAGTCCACGCCGTAAACGATGAGTGCTAAGTGTTAGGGGGTTTCCGCCCCTAGTGCTGCAGCTAACGCATTAAGCACTCCGCCTGGGGAGTACGGTTCGCAAGACTGAAACTCAAAGGAATTGACGGGGGCCGCACAAGCGGTGGAGCATGTGGTTAATTGGAAGCAACGCGAAGAACCTTACCAGGTCTTGACATCCTCTGACAATCCTAGAGATAGGACGTCCCTTCGGGGGCAGAGTGACAGGTGGTGCATGGTTGTCGTCAGCTCGTGTCGTGAGATGTTGGGTAAAGTCCCGCAACGAGCGCAACCCCTTGATCTTAGTTGCCAGCATTCAGTTGGGCACTCTAAGGTGACTGCCGTGACAAACCGGAGGAAGGTGGGGATGACGTCAAATCATCATGCCCTTATGACCTGGGTACACACGTGCTACAATGGACAGAAACAAAGGGCAGCGAAACCGCGAGGTTAAGCCAATCCCAAAATCTGTTCTCAAGTTCGGATCGCATCTGCAACTCGACTGCGTGAAGCTGGAATCGCTAGTAATCGCGATCAGCATGCCGCGGTGAATACGTTCCCGGGCCTTGATACACCGCCCGTCACACCACGAGAGTTT

BLASTN 2.2.30+ Database: Nucleotide collection (nt)    57,030,965 sequences;    257,768,224,489 total letters

Reference: Zheng Zhang, Scott Schwartz, Lukas Wagner, and Webb Miller (2000), "A greedy algorithm for aligning DNA sequences", J Comput Biol 2000; 7(1-2):203-14.

| Description                                                               | Scientific Name   | Max Score | Total Score | Query Cover | Percent Identity | Accession Length | Accession   |
|---------------------------------------------------------------------------|-------------------|-----------|-------------|-------------|------------------|------------------|-------------|
| Bacillus subtilis strain JCM 1465 16S ribosomal RNA, partial sequence     | Bacillus subtilis | 2466      | 2466        | 100%        | 99.63            | 1472             | NR_113265.1 |
| Bacillus subtilis strain NBRC 13719 16S ribosomal RNA, partial sequence   | Bacillus subtilis | 2466      | 2466        | 100%        | 99.63            | 1475             | NR_112629.1 |
| Bacillus subtilis strain DSM 10 16S ribosomal RNA, partial sequence       | Bacillus subtilis | 2466      | 2466        | 100%        | 99.63            | 1517             | NR_027552.1 |
| Bacillus subtilis strain IAM 12118 16S ribosomal RNA, complete sequence   | Bacillus subtilis | 2460      | 2460        | 100%        | 99.56            | 1550             | NR_112116.2 |
| Bacillus subtilis strain BCRC 10255 16S ribosomal RNA, partial sequence   | Bacillus subtilis | 2460      | 2460        | 100%        | 99.56            | 1468             | NR_116017.1 |
| Bacillus subtilis strain NCDO 1769 16S ribosomal RNA, partial sequence    | Bacillus subtilis | 2416      | 2416        | 100%        | 98.96            | 1427             | NR_118972.1 |
| Bacillus subtilis strain SBMP4 16S ribosomal RNA, partial sequence        | Bacillus subtilis | 2399      | 2399        | 100%        | 98.74            | 1463             | NR_118383.1 |
| Bacillus subtilis strain NRRL NRS-744 16S ribosomal RNA, partial sequence | Bacillus subtilis | 2130      | 2130        | 86%         | 99.57            | 1168             | NR_116192.1 |
| Bacillus subtilis strain NRRL B-4219 16S ribosomal RNA, partial sequence  | Bacillus subtilis | 2130      | 2130        | 86%         | 99.57            | 1168             | NR_116183.1 |

Company: Cosmogenetech co, Ltd.

Website: www.cosmogenetech.com

**Table S2.** Western blot antibodies information

| Peptide/Protein target     | Manufacturer              | Catalog      | Dilution ratio |
|----------------------------|---------------------------|--------------|----------------|
| Actin                      | Thermo Fisher scientific  | MA 5-11869   | 1:1,000        |
| GPAM                       | abcam                     | ab69990      | 1:1,000        |
| SREBP-1                    | abcam                     | ab28481      | 1:1,000        |
| Total AMPK- $\alpha$       | Cell signaling technology | #5831        | 1:1,000        |
| Phospho AMPK- $\alpha$     | Cell signaling technology | #2535        | 1:1,000        |
| PPAR- $\alpha$             | abcam                     | ab24509      | 1:1,000        |
| Nrf2                       | Cell signaling technology | #12721       | 1:1,000        |
| Lamin B1                   | abcam                     | ab16048      | 1:1,000        |
| HO-1                       | Thermo Fisher scientific  | MA1-112      | 1:1,000        |
| Goat Anti-Rabbit IgG (HRP) | GeneTex                   | GTX213110-01 | 1:5,000        |
| Goat Anti-Mouse IgG (HRP)  | GeneTex                   | GTX213111-01 | 1:5,000        |

Abbreviations: GAMP, Glycerol-3-Phosphate Acyltransferase, Mitochondrial; PPAR-  $\alpha$ , Peroxisome proliferator-activated receptor; AMPK, AMP-activated protein kinase; FAS, fatty acid synthase; SREBP-1, Sterol regulatory element-binding protein 1; Nrf2, Nuclear factor E2-related factor; HO-1, Heme oxygenase-1; HRP, horseradish peroxidase; IgG, Immunoglobulin G.

**Figure S1.** Data of rarefaction curve

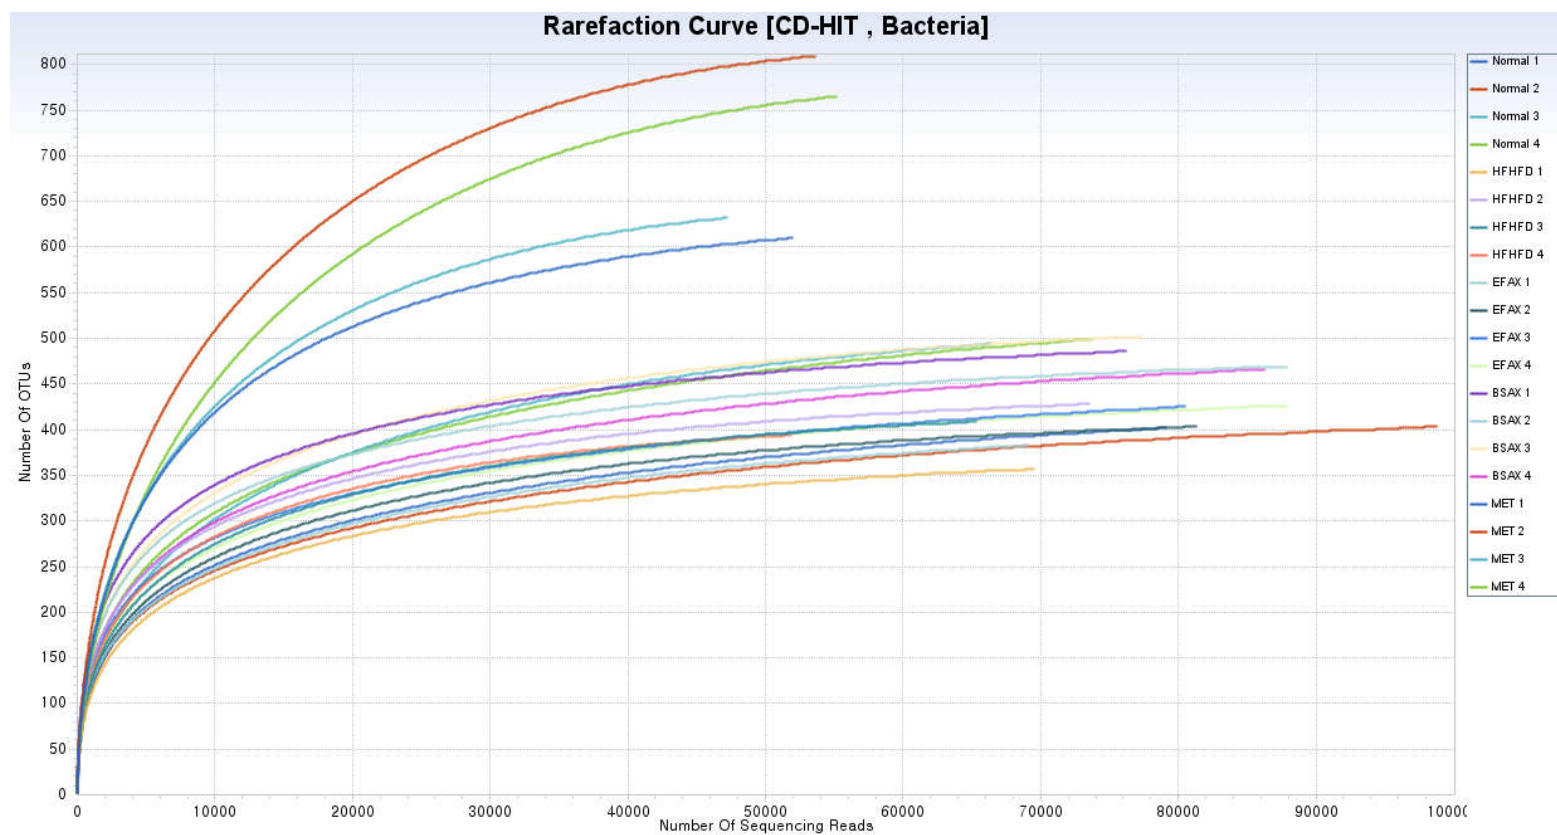

Figure S2. Correlation between gut microbiota and oxidative stress-related parameters

## Min = -0.73

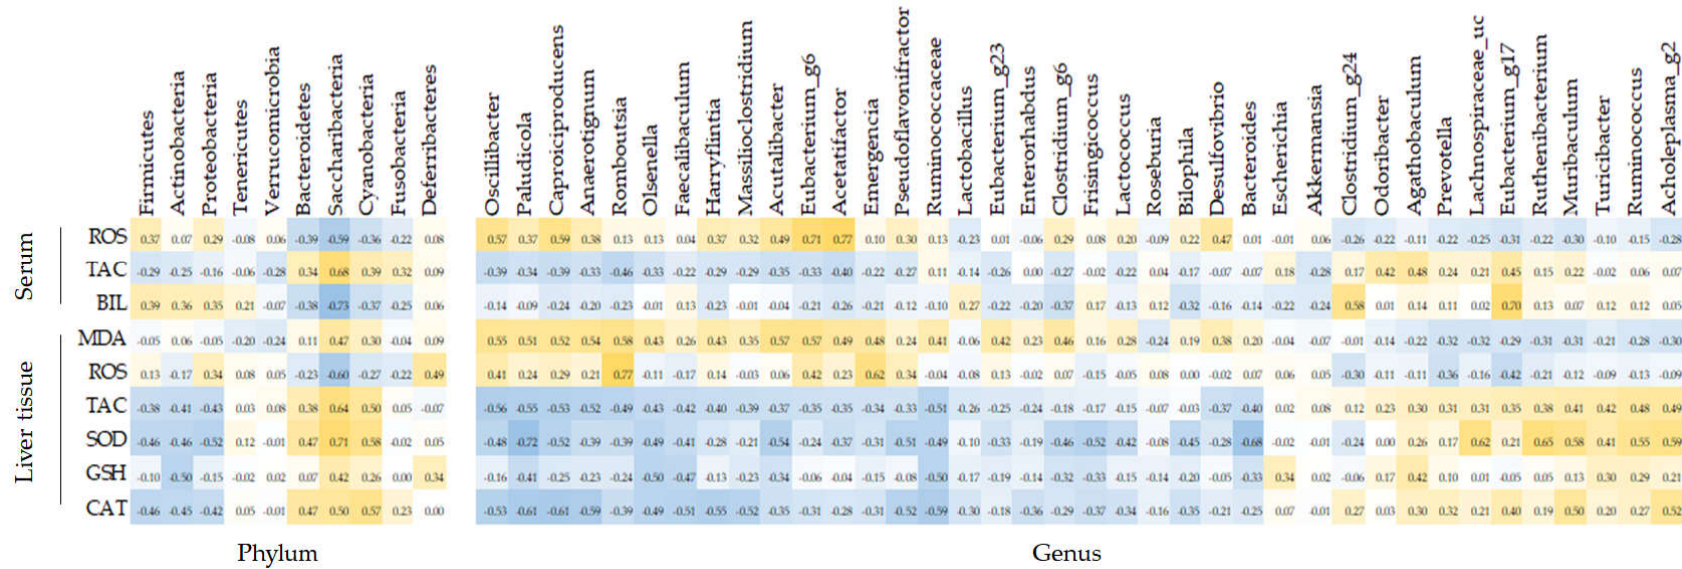

The two-tailed Pearson's correlation test was performed by SPSS 17.0. As the colors scale shows, the Pearson correlation coefficient (r) presents inside the grid, the yellow color indicates a positive correlation, and the blue color displays a negative correlation. r value (Pearson correlation coefficient) more than 0.4 or less than -0.4 were considered as a strong correlation with positive and negative, respectively.
